# Supplementary material for: Going slow to go fast: landscape designs to achieve multiple benefits
Source: Frontiers journal article supplement (doi:10.3389/fenvs.2025.1560125), 2025-04-28

## SUPPLEMENTARY MATERIALS

**Table 1S.** Data sources and associated references for each of the 21 metrics included in the comparison of two contrasting management scenarios in the central Sierra Nevada, USA.

| Pillar            | Element                | Metric                                | Data Sources                                                                              | References                                                                                      |
|-------------------|------------------------|---------------------------------------|-------------------------------------------------------------------------------------------|-------------------------------------------------------------------------------------------------|
| Forest Resilience | Forest Structure       | Tree density                          | NCX, LANDIS-II, contemporary reference areas, climate classes, landscape management units | North, 2012; Jeronimo et al., 2019                                                              |
|                   |                        | Basal area                            | NCX, Forest Inventory and Analysis (FIA), LANDIS-II                                       | North, 2012; Jeronimo et al., 2019                                                              |
|                   |                        | Structural heterogeneity              | NCX, LANDIS-II, California Forest Observatory, contemporary reference areas               | North, 2012; Jeronimo et al., 2019                                                              |
|                   |                        | Large tree density                    | NCX, LANDIS-II, contemporary reference conditions                                         | North, 2012; Stephens et al., 2015; Jeronimo et al., 2019                                       |
|                   | Vegetation Composition | Seral stage                           | NCX, LANDIS-II                                                                            | Mayer and Laudenslayer, 1988; Collins and Stephens, 2010; North, 2012; Jeronimo et al., 2019    |
|                   |                        | Evenness                              | NCX, LANDIS-II                                                                            | Shannon, 1948; Pielou, 1966; North, 2012; Jeronimo et al., 2019                                 |
|                   | Disturbance            | Disturbance return interval frequency | Multiple state sources and literature, FRAP, CalMAPPER, FACTS, LANDIS-II, eDaRT           | Hansen et al., 2013; Safford and van de Water, 2014; Fettig et al., 2019; Koltunov et al. 2020  |
|                   |                        | Disturbance delinquency               | Multiple state sources and literature, FRAP, CalMAPPER, FACTS, LANDIS-II, eDaRT           | Hansen et al., 2013; Safford and van de Water, 2014; Fettig et al., 2019; Koltunov et al., 2020 |

**Table 1S cont.**

|                           |                     |                                            |                                                                                                           |                                                                                                             |
|---------------------------|---------------------|--------------------------------------------|-----------------------------------------------------------------------------------------------------------|-------------------------------------------------------------------------------------------------------------|
| Fire Dynamics             | Fire Severity       | Probability of high severity fire          | FLEP-Gen, LANDIS-II                                                                                       | Scott et al., 2013; Scott, 2020; Manley et al., 2023                                                        |
|                           |                     | Probability of large high severity patches | FLEP-Gen, LANDIS-II                                                                                       | Collins and Stephens, 2010; Scott et al., 2013; Safford and Stevens, 2017; Scott, 2020; Manley et al., 2023 |
|                           | Functional Fire     | Fire as disturbance                        | FLEP-Gen, LANDIS-II                                                                                       | Collins and Stephens, 2010; Miller et al., 2012; Scott et al., 2013; Scott, 2020; Manley et al., 2023       |
| Fire-adapted Communities  | Fire Hazard         | Probability of low severity fire in WUI    | USEPA ORD 2017, FLEP-Gen, LANDIS-II, Healthy Forests Restoration Act (HFRA) of 2003 (16 U.S.C. §§108–148) | Scott, 2020                                                                                                 |
| Carbon Sequestration      | Carbon Storage      | Total AGL carbon                           | LANDIS-II, USDA NRCS 2020                                                                                 | Wilson et al., 2013; Maxwell et al., 2022; Manley et al., 2023                                              |
| Biodiversity Conservation | Focal Species       | California spotted owl                     | LANDIS-II                                                                                                 | Gutierrez et al., 2017                                                                                      |
|                           | Species Diversity   | Species richness                           | CDFW CIWTG 2014, LANDIS-II                                                                                | Mayer and Laudenslayer, 1988                                                                                |
|                           |                     | Old forest species richness                | CDFW CIWTG 2014, LANDIS-II                                                                                | Mayer and Laudenslayer, 1988                                                                                |
|                           | Community Integrity | Functional group diversity (5 groups)      | CDFW CIWTG 2014, LANDIS-II                                                                                | Mayer and Laudenslayer, 1988; Laureto et al., 2015                                                          |

**Table 2S.** Rank values used to prioritize the selection of areas for treatment in the Ecosystem Resilience management strategy. Rank values were assigned to combined objectives of treating priority landscape conditions (first column) and of maximizing the number of pillars (remaining columns) that could be improved by management in a given location. Treatment areas were created and selected within each HUC-12 watershed based on rank value (ranging from 1 to 35). Lower rank values were a higher priority for selection.

|                                                        | <b>Number of pillars available for improvement</b> |          |          |          |          |
|--------------------------------------------------------|----------------------------------------------------|----------|----------|----------|----------|
| <b>Landscape conditions<br/>(high to low priority)</b> | <b>0</b>                                           | <b>1</b> | <b>2</b> | <b>3</b> | <b>4</b> |
| Infrastructure                                         | 5                                                  | 4        | 3        | 2        | 1        |
| High value resources - in moderate condition           | 10                                                 | 9        | 8        | 7        | 6        |
| High value resources - at risk from climate            | 24                                                 | 20       | 16       | 13       | 11       |
| Protect                                                | 27                                                 | 23       | 19       | 15       | 12       |
| Adapt                                                  | 29                                                 | 26       | 22       | 18       | 14       |
| Neutral                                                | 30                                                 | 28       | 25       | 21       | 17       |
| Transform                                              | 35                                                 | 34       | 33       | 32       | 31       |

**Table 3S.** Correlation matrix for the metrics representing conditions across the landscape. Outlined cells indicate correlation coefficients > 0.25 (positive or negative) and considered a linked response. Based on raw values derived for forested areas within the 1-M hectare Tahoe Central Sierra Initiative landscape in California and Nevada, USA (Manley et al., 2023).

| Pillar                   | Metric                   | Tree density | Basal area | Heterogeneity (gap) | Heterogeneity (fractal) | Large tree density | Seral stage | Evenness |
|--------------------------|--------------------------|--------------|------------|---------------------|-------------------------|--------------------|-------------|----------|
| Forest resilience        | Tree density             | 1.00         |            |                     |                         |                    |             |          |
| Forest resilience        | Basal area               | 0.52         | 1.00       |                     |                         |                    |             |          |
| Forest resilience        | Heterogeneity (gap)      | -0.37        | -0.52      | 1.00                |                         |                    |             |          |
| Forest resilience        | Heterogeneity (fractal)  | -0.38        | -0.52      | 0.83                | 1.00                    |                    |             |          |
| Forest resilience        | Large tree density       | -0.09        | 0.50       | -0.19               | -0.22                   | 1.00               |             |          |
| Forest resilience        | Seral stage              | 0.04         | 0.05       | -0.07               | -0.09                   | 0.03               | 1.00        |          |
| Forest resilience        | Evenness                 | -0.10        | -0.19      | 0.05                | 0.01                    | -0.08              | -0.01       | 1.00     |
| Forest resilience        | Disturb. return interval | 0.09         | 0.14       | -0.13               | -0.12                   | 0.06               | -0.01       | 0.02     |
| Forest resilience        | Disturb. delinquency     | -0.02        | 0.04       | 0.08                | 0.16                    | 0.02               | -0.05       | 0.05     |
| Fire dynamics            | Prob. HS fire            | 0.21         | 0.24       | -0.38               | -0.48                   | 0.11               | 0.08        | 0.01     |
| Fire dynamics            | HS patch size            | 0.07         | 0.02       | -0.17               | -0.29                   | 0.00               | 0.08        | 0.11     |
| Fire dynamics            | Fire return interval     | 0.09         | 0.11       | -0.13               | -0.19                   | 0.04               | 0.03        | -0.07    |
| Fire-adapted communities | Prob. of LS fire         | -0.17        | -0.15      | 0.34                | 0.43                    | -0.06              | -0.10       | -0.02    |
| Carbon sequestration     | Stable carbon            | 0.35         | 0.63       | -0.45               | -0.43                   | 0.31               | 0.06        | -0.23    |

**Table 3S cont.**

| <b>Pillar</b>            | <b>Metric</b>            | <b>Disturbance<br/>return<br/>interval<br/>departure</b> | <b>Disturbance<br/>delinquency</b> | <b>Probability<br/>of high<br/>severity<br/>fire</b> | <b>High<br/>severity<br/>patch size</b> | <b>Fire<br/>return<br/>interval<br/>departure</b> | <b>Probability<br/>of low<br/>severity<br/>fire</b> |
|--------------------------|--------------------------|----------------------------------------------------------|------------------------------------|------------------------------------------------------|-----------------------------------------|---------------------------------------------------|-----------------------------------------------------|
| Forest resilience        | Tree density             |                                                          |                                    |                                                      |                                         |                                                   |                                                     |
| Forest resilience        | Basal area               |                                                          |                                    |                                                      |                                         |                                                   |                                                     |
| Forest resilience        | Heterogeneity (gap)      |                                                          |                                    |                                                      |                                         |                                                   |                                                     |
| Forest resilience        | Heterogeneity (fractal)  |                                                          |                                    |                                                      |                                         |                                                   |                                                     |
| Forest resilience        | Large tree density       |                                                          |                                    |                                                      |                                         |                                                   |                                                     |
| Forest resilience        | Seral stage              |                                                          |                                    |                                                      |                                         |                                                   |                                                     |
| Forest resilience        | Evenness                 |                                                          |                                    |                                                      |                                         |                                                   |                                                     |
| Forest resilience        | Disturb. return interval | 1.00                                                     |                                    |                                                      |                                         |                                                   |                                                     |
| Forest resilience        | Disturb. delinquency     | 0.44                                                     | 1.00                               |                                                      |                                         |                                                   |                                                     |
| Fire dynamics            | Prob.HS fire             | 0.19                                                     | -0.13                              | 1.00                                                 |                                         |                                                   |                                                     |
| Fire dynamics            | HS patch size            | 0.09                                                     | -0.06                              | 0.08                                                 | 1.00                                    |                                                   |                                                     |
| Fire dynamics            | Fire return interval     | 0.15                                                     | -0.47                              | 0.17                                                 | 0.08                                    | 1.00                                              |                                                     |
| Fire-adapted communities | Prob. of LS fire         | -0.17                                                    | 0.15                               | -0.76                                                | -0.33                                   | -0.18                                             | 1.00                                                |
| Carbon sequestration     | Stable carbon            | 0.13                                                     | 0.02                               | 0.23                                                 | 0.12                                    | 0.11                                              | -0.20                                               |





**Figure 1S.** Flow diagram outlining the linkages between initial, intermediate, and final products used in the selection of treatments and the evaluation of scenario outcomes. Orange boxes indicate primary outcomes used to evaluate two management scenarios: 1) fire risk reduction, and 2) improve ecosystem resilience. Blue boxes indicate the primary criteria used to drive the selection of treatment locations in one or both scenarios.

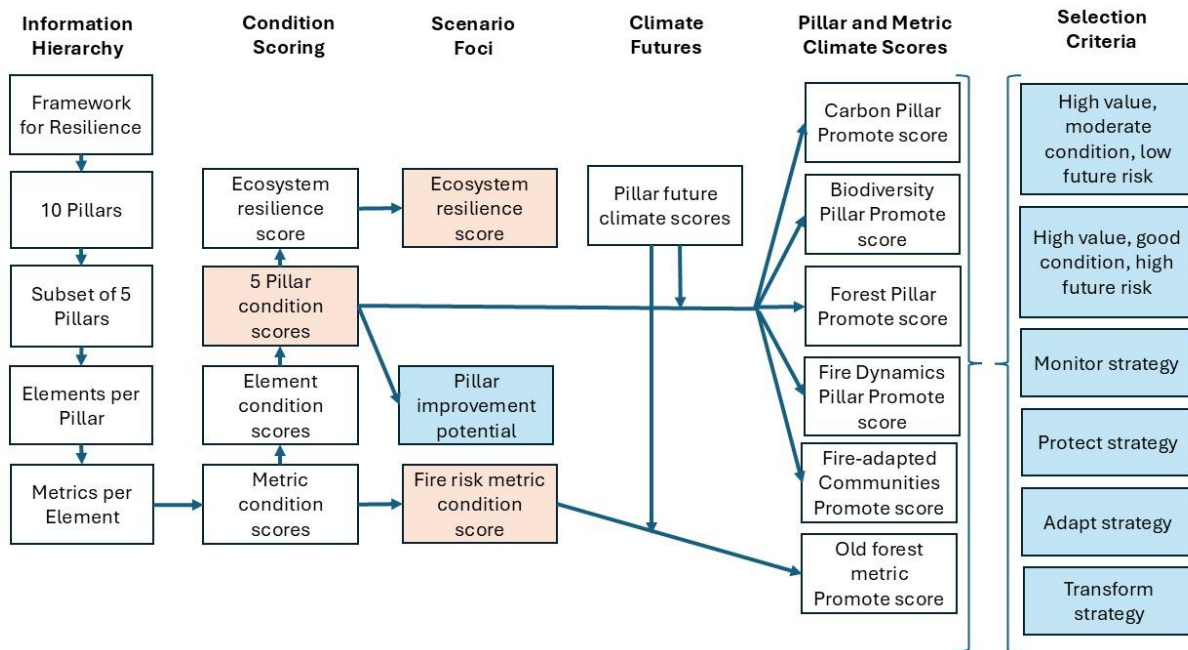

Supplement: Data_Sheet_1.pdf [file Data_Sheet_1.pdf]
